# Supplementary material
Source: PubMed Central journal article supplement (PMC4779666)
Supplement: NIHMS751168-supplement-1.pdf [file NIHMS751168-supplement-1.pdf]

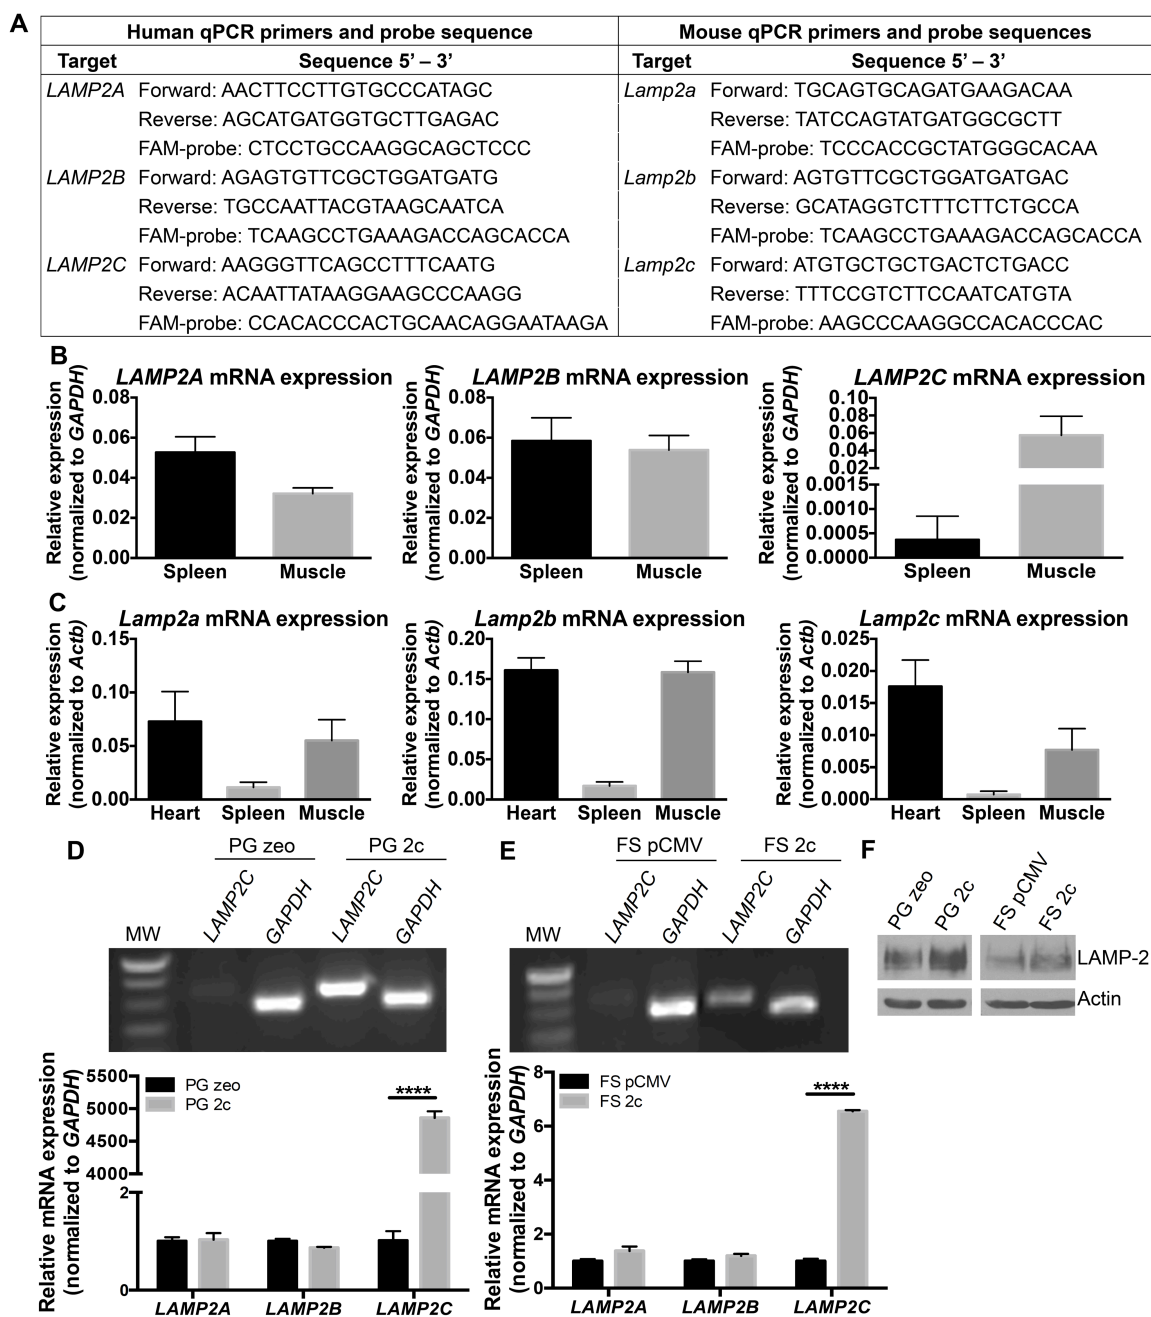

### Supplemental Figure 1. LAMP-2 expression in human or mouse tissues and cells.

(A) TaqMan primers and probes designed for detection of human or mouse isoforms. (B) Gene expression of *LAMP2* isoforms in human spleen and muscle. mRNA levels were normalized to *GAPDH* expression. (C) Gene expression of *Lamp2* isoforms in tissues from DBA/2J mice. mRNA levels were normalized to *Actb* expression. (D and E) RT-PCR analysis for *LAMP2C* in PriessGAD or FrevSMA cells transfected with a plasmid encoding for *LAMP2C*. mRNA levels of *LAMP2A*, *LAMP2B*, and *LAMP2C* in these cells were analyzed by qPCR and normalized to *GAPDH* expression. (F) Lysates from B-LCL transfected with *LAMP2C* were prepared and their proteins were resolved by SDS-PAGE and immunoblotted with antibodies to detect LAMP-2 and actin. (B and C) Mean  $\pm$  SD,  $n \geq 3$ . (D and E) Data were analyzed by two-way ANOVA. \*\*\*\* $p < 0.0001$  (mean  $\pm$  SD,  $n = 3$ ).

## Supplemental Figure 2

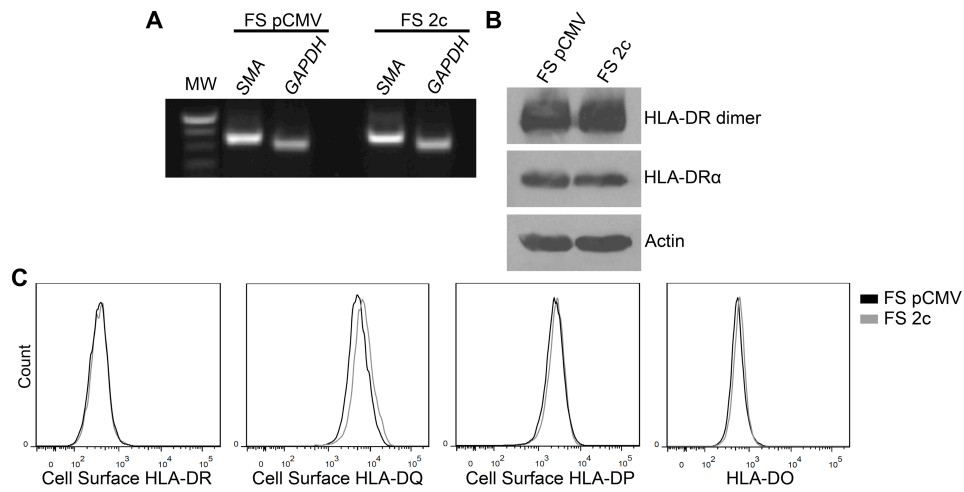

**Supplemental Figure 2. Analysis of CMA and MHCII pathway components in FS B cells with and without ectopic LAMP-2C expression.** (A) RT-PCR was performed to detect mRNA levels of *SMA* and *GAPDH* in FS pCMV and FS 2c. (B) Cell lysates from FS pCMV and FS 2c B cells were prepared and their proteins were resolved by SDS-PAGE and immunoblotted with Abs to detect the HLA-DR dimer, HLA-DR  $\alpha$  chain, and actin. (C) FS pCMV and FS 2c cells were incubated with Abs to detect cell surface expression of HLA-DR, HLA-DQ, or HLA-DP and total cellular levels of HLA-DO. (Representative of  $n = 3$ ).

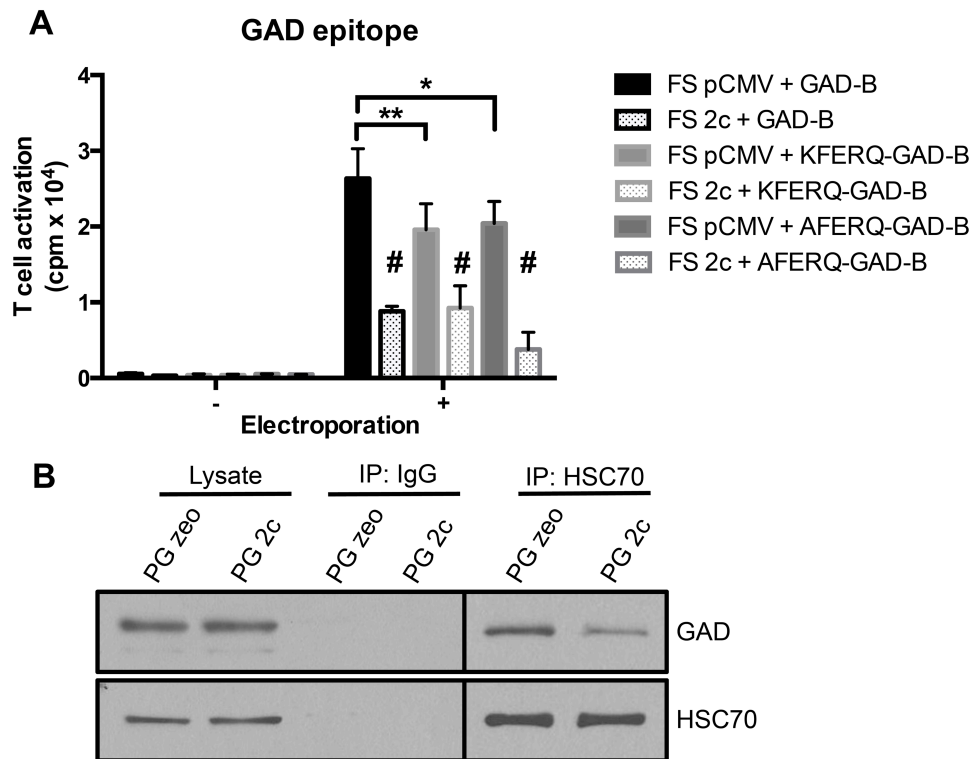

**Supplemental Figure 3. Alterations in the CMA pathway in cells with increased LAMP-2C expression.** (A) Peptide translocation and presentation dependent on CMA were reduced in FS B cells with ectopic LAMP-2C expression. FS pCMV and FS 2c B cells were incubated with 20  $\mu$ M GAD<sub>273-285</sub>-biotin, followed by electroporation to deliver this peptide to the cytoplasm. Control cells were not subjected to electroporation. Cells were acid-stripped and washed extensively to remove extracellular peptide. After culturing cells for 16 h, APCs were incubated with GAD specific T cells and MHCII-T cell activation was measured at an APC:T cell ratio of 0.5:1. To examine if peptide modification with a strong motif for CMA (KFERQ) could overcome the inhibitory effects of LAMP-2C, presentation of the peptide KFERQ-GAD<sub>273-285</sub>-biotin was compared with a control peptide, AFERQ-GAD<sub>273-285</sub>-biotin using the conditions above. Data were analyzed by two-way ANOVA. \* $p < 0.05$  and \*\* $p < 0.01$  for FS pCMV + GAD-B vs FS pCMV + KFERQ-GAD-B or FS pCMV + AFERQ-GAD-B. # $p < 0.0001$ , FS pCMV vs FS 2c for each peptide (Representative of  $n = 2$ ). (B) Analysis of HSC70 association with CMA substrate GAD in B cells with and without ectopic LAMP-2C expression. Proteins immunoprecipitated (IP) with an isotype control Ab (IgG) or an Ab specific for HSC70 were resolved by SDS-PAGE and immunoblotted to detect associated GAD or HSC70. As a control, cell lysates were also analyzed and immunoblotted to detect GAD or HSC70 (Representative of  $n = 3$ ).
